# Supplementary material for: Facile fabrication of tunable porous zirconium fumarate based metal organic frameworks in the retention of nutrients from water
Source: Royal Society of Chemistry journal article supplement (doi:10.1039/d0ew00385a), 2020-01-01
Supplement: d0ew00385a1.pdf [file d0ew00385a1.pdf]

1 **Supplementary Material**

2 **Facile fabrication of tunable porous zirconium fumarate based metal organic frameworks**  
3 **in the retention of nutrients from water**

4 Ilango Aswin Kumar<sup>a</sup>, Mu. Naushad<sup>b</sup>, Tansir Ahamad<sup>b</sup> and Natrayasamy Viswanathan<sup>a\*</sup>

5 <sup>a</sup>Department of Chemistry, Anna University, University College of Engineering - Dindigul,  
6 Reddiyarchatram, Dindigul - 624 622, Tamilnadu, India.

7 <sup>b</sup>Department of Chemistry, College of Science, King Saud University, Riyadh - 11451,  
8 Kingdom of Saudi Arabia.

9  
10  
11  
12  
13  
14  
15  
16  
17  
18  
19  
20  
21  
22  
23 \* Corresponding author. Tel.: +91-451-2554066 (O); fax: +91-451-2554066.

24 E-mail address: drnviswanathan@gmail.com (N. Viswanathan)

25 3.6 Adsorption isotherms of Zr@Fu MOF composite

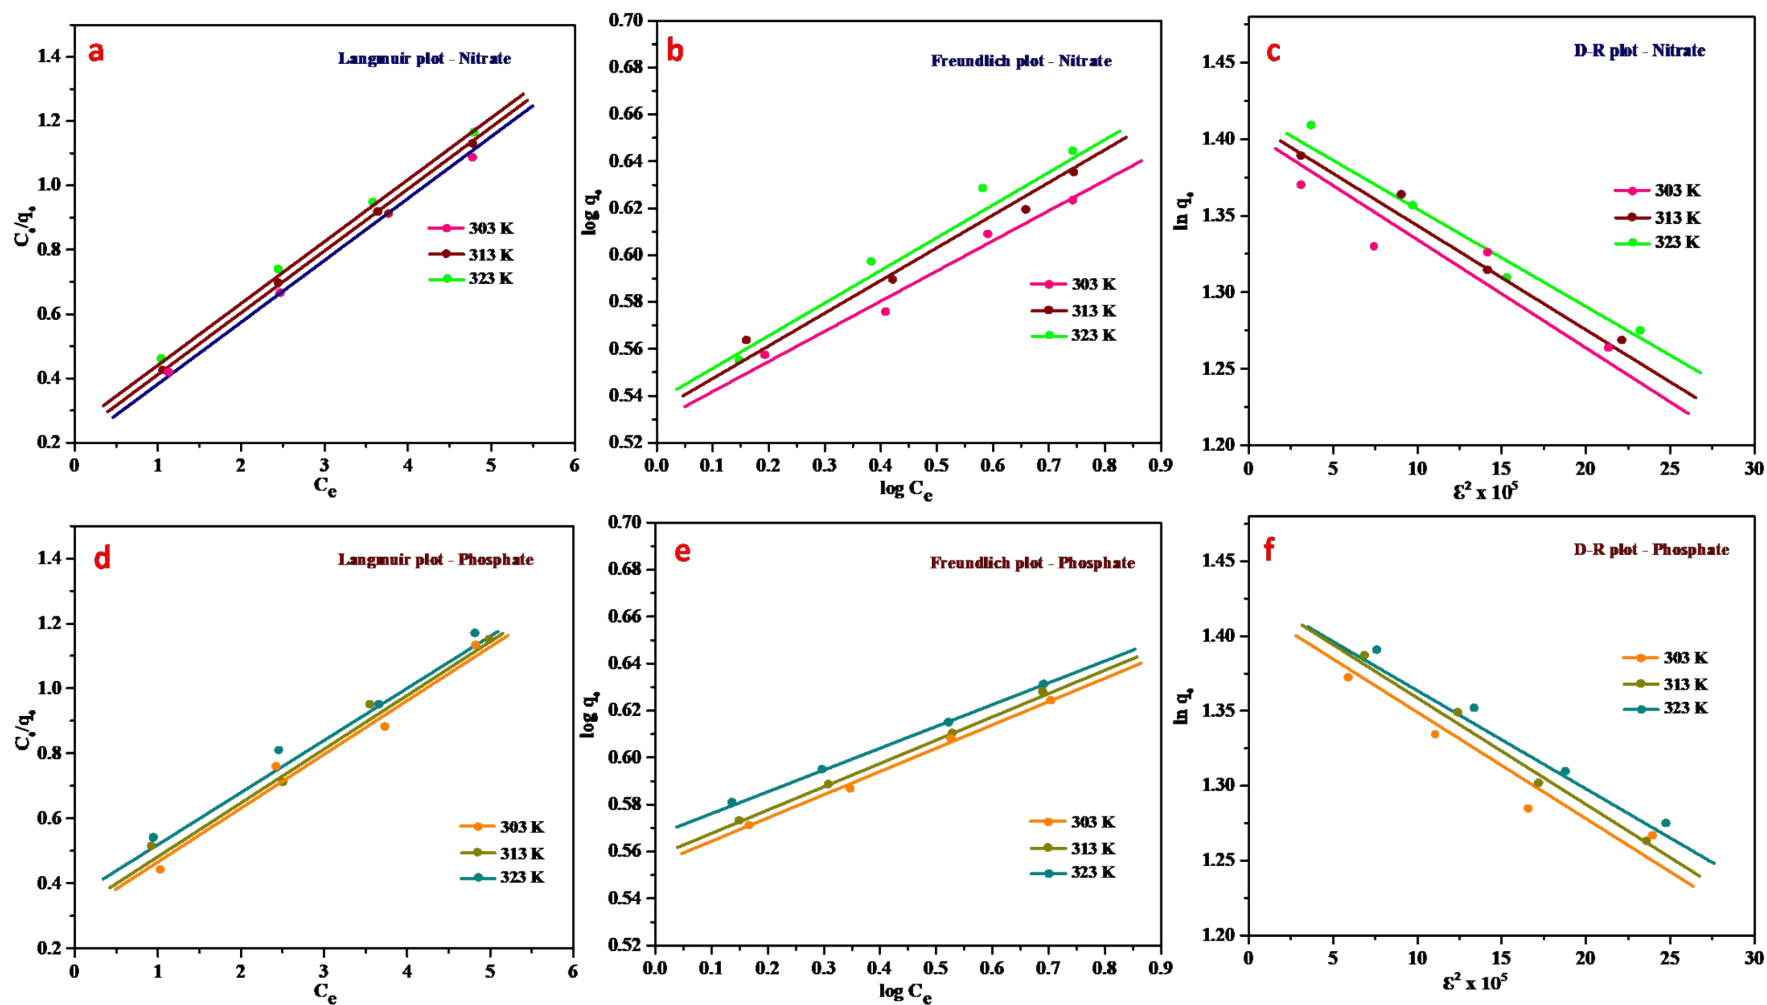

26

27 **Fig. S1** Isotherm linear plots of (a, d) Langmuir, (b, e) Freundlich and (c, f) D-R isotherms of Zr@Fu MOF composite on  $\text{NO}_3^-$  and  $\text{PO}_4^{3-}$   
 28 adsorption respectively at 303, 313 and 323 K.

29 3.8 Kinetic studies of Zr@Fu MOF composite

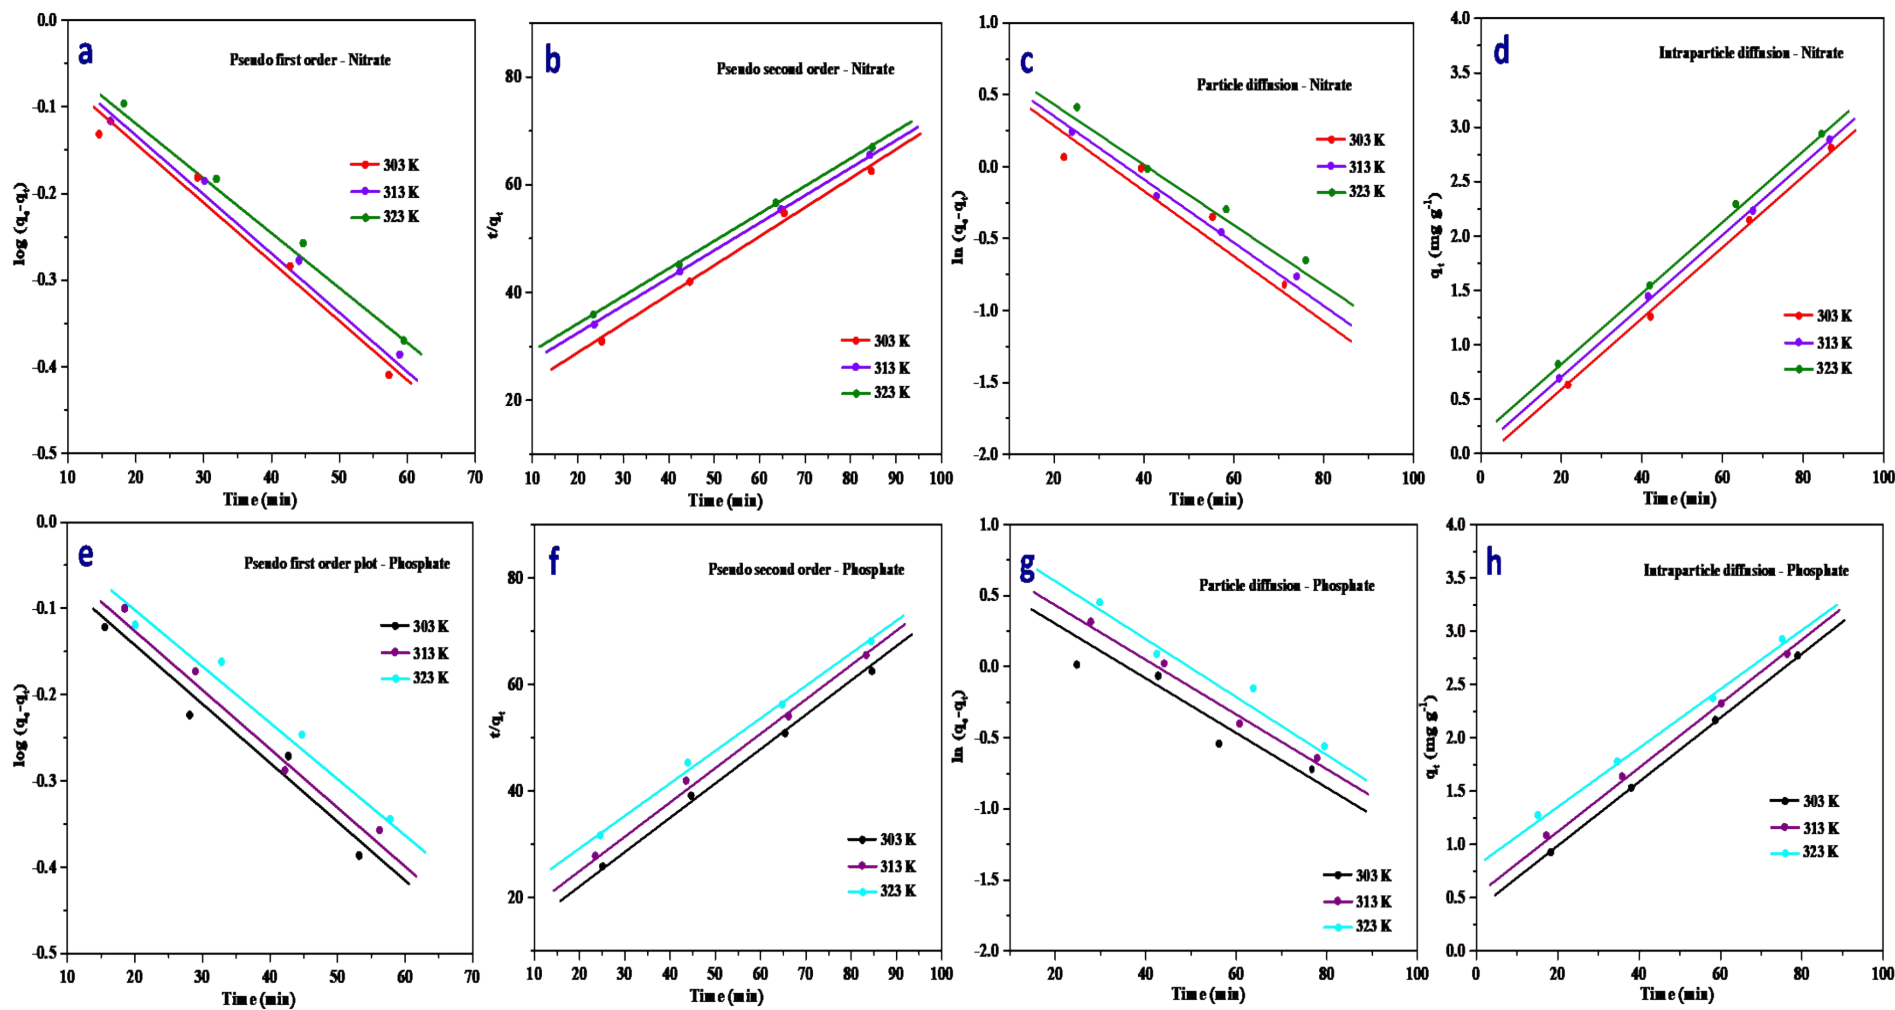

30 Fig. S2 Kinetic linear plots of (a, e) pseudo first order, (b, f) pseudo second order, (c, g) particle diffusion and (d, h) intraparticle  
 31 diffusion kinetic models of Zr@Fu MOF composite on  $\text{NO}_3^-$  and  $\text{PO}_4^{3-}$  adsorption respectively at 303, 313 and 323 K.
